# Supplementary material for: ELABELA-APJ axis protects from pressure overload heart failure and angiotensin II-induced cardiac damage
Source: Oxford University Press journal article supplement (doi:10.1093/cvr/cvx061), 2017-03-22
Supplement: cvx061_Supp.pdf [file cvx061_Supp.pdf]

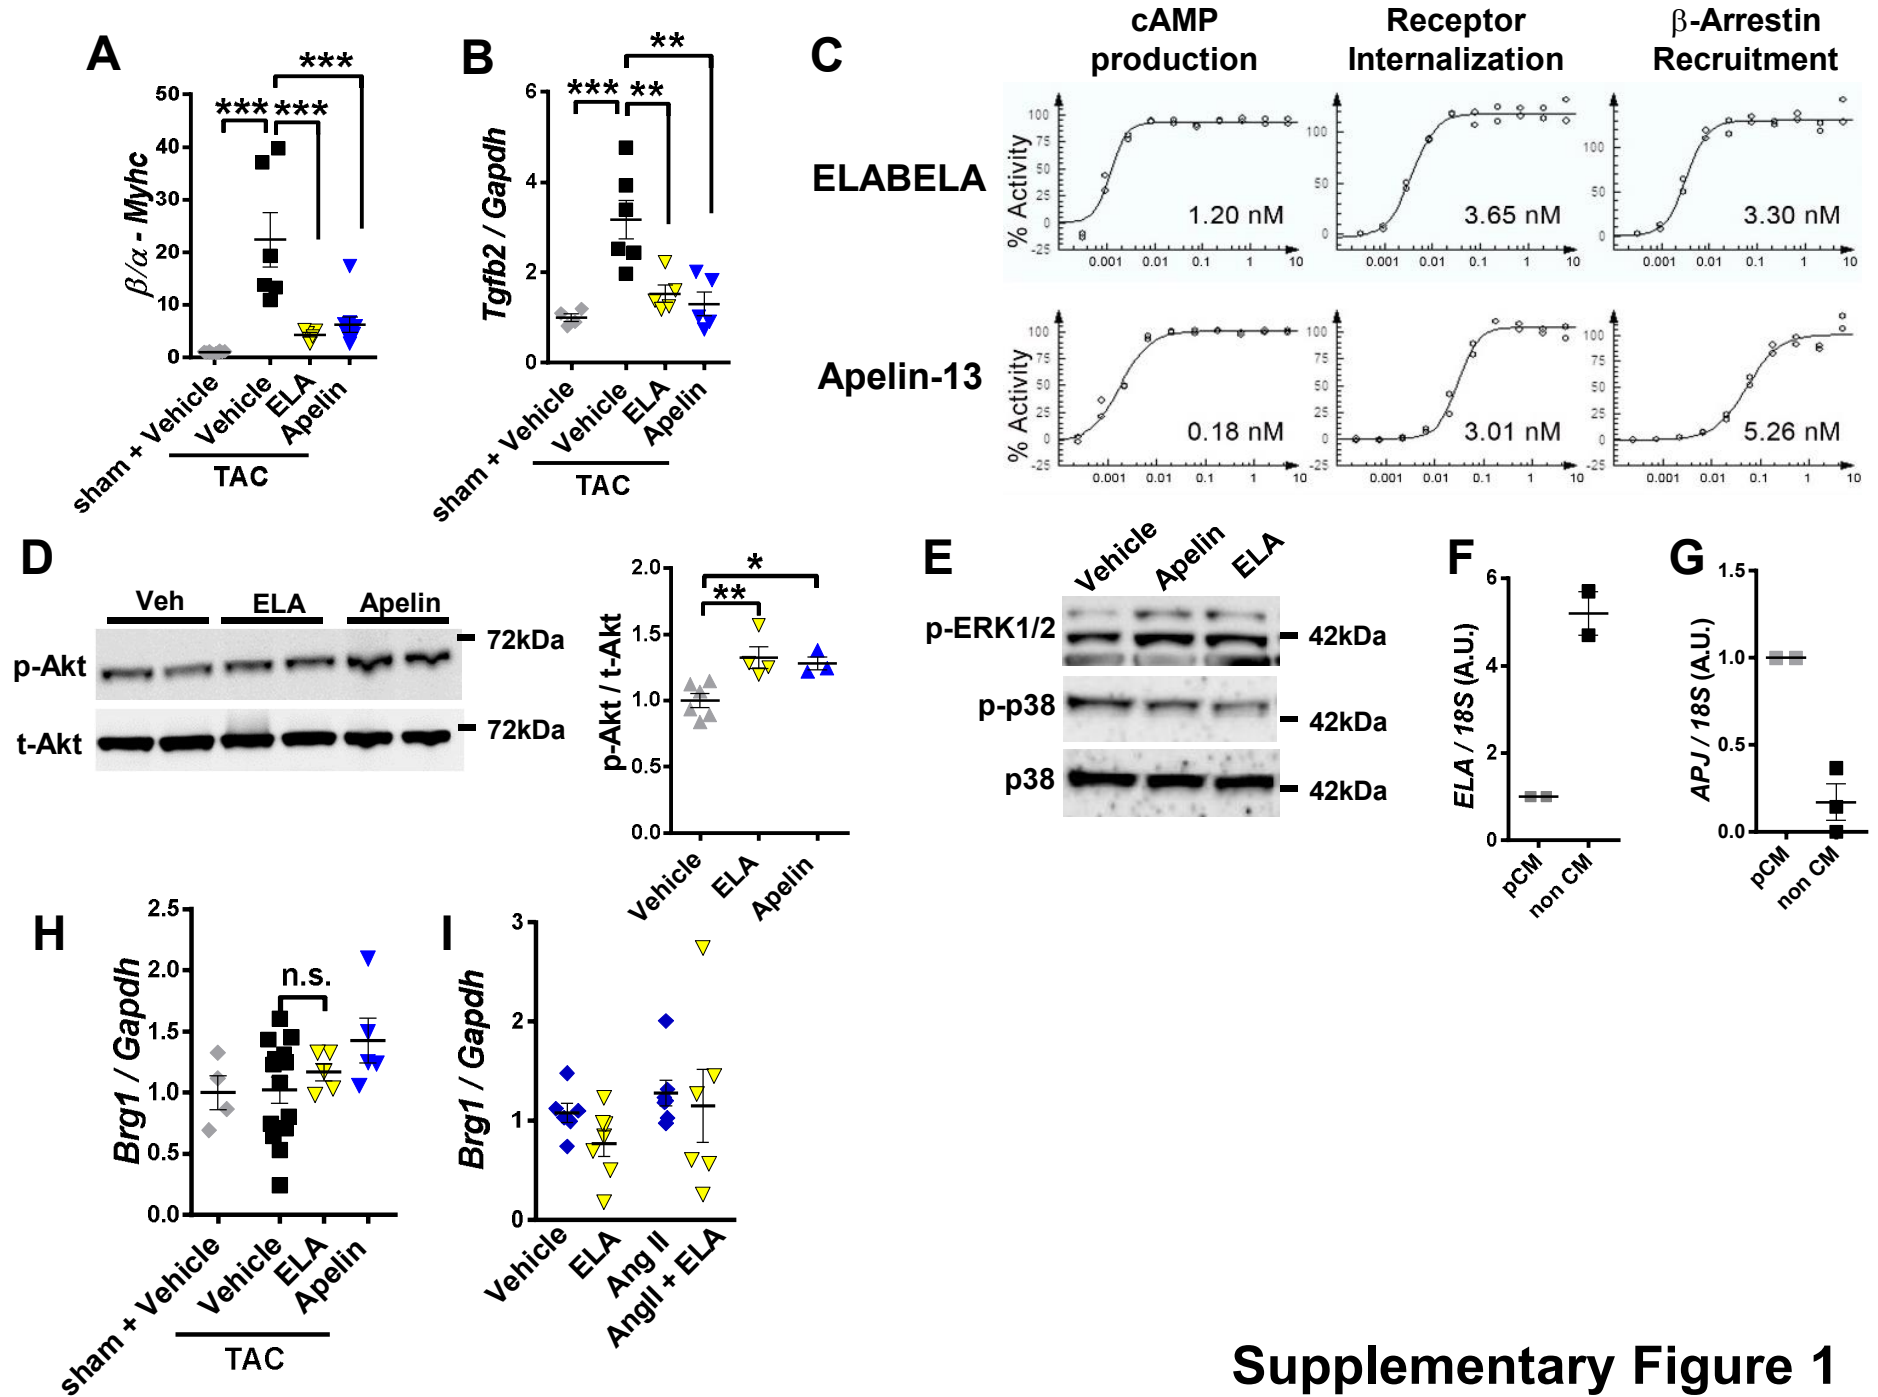

Supplementary Figure 1

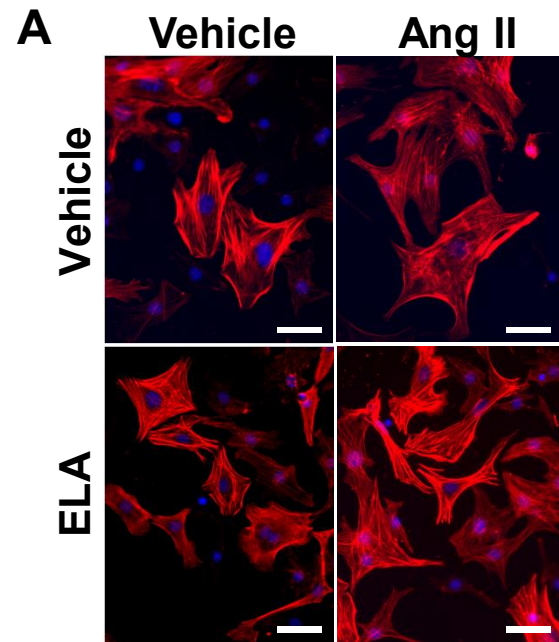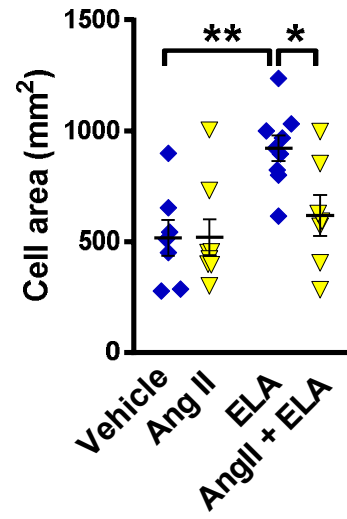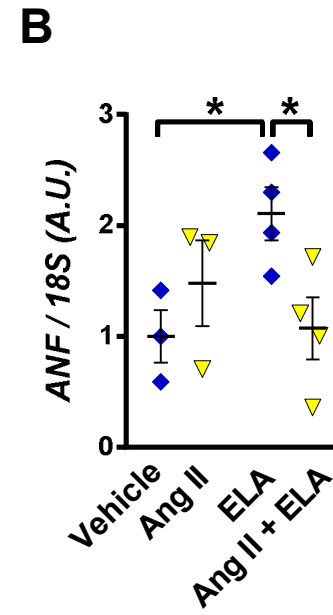

Supplementary Figure 2

**Supplemental Table1**

| Gene         | Forward Sequence (5'-3') | Reverse Sequence (5'-3')  |
|--------------|--------------------------|---------------------------|
| <i>BNP</i>   | ATGGATCTCCTGAAGGTGCTG    | GTGCTGCCTTGAGACCGAA       |
| <i>ANF</i>   | TGAGAAAAGCACGGAGGTATCC   | AGAGTTTTGAAAGTTGCTCACATCA |
| <i>b-MHC</i> | GCAGCAGTTGGATGAGCGAC     | TGCCTCCTCCAGCCTTTCAC      |
| <i>a-MHC</i> | CAAGAGGCAACTGGAGGAGGAAG  | GCCTCTGAGCCAGCTTCTTCTTG   |
| <i>Tgfb2</i> | AGAAGCGCGCTTTGGATGCTGC   | TGGGACACACAGCAAGGGGAAG    |
| <i>Ltbp2</i> | AAATGGCCAGCTGGAGTGTCCC   | TTCACGCACTCCGAGTCCTTGC    |
| <i>Postn</i> | TGCTCTGCTGCTGCTGTTCTG    | TGCTGGAGGGCACAGACGTTTG    |
| <i>Col8a</i> | TCAGACTCATTACAGGCCGGTGC  | CGCGCAAACCTGGCTAACGGTAC   |
| <i>Agt</i>   | GAGGCAAATCTGAGCAACATTG   | GAGTTCGAGGAGGATGCTATTGA   |
| <i>Ace</i>   | TGAGAAAAGCACGGAGGTATCC   | AGAGTTTTGAAAGTTGCTCACATCA |
| <i>Ace2</i>  | CTACAGGCCCTTCAGCAAAG     | TGCCAGACCCTAGAGTTGT       |
| <i>Apj</i>   | CTCAGCAGCTACCTCATCTTTGT  | TGAAGTGGCCACCATAGAGTAGT   |
| <i>Tbp</i>   | GGAATTGTACCGCAGCTTCAA    | GATGACTGCAGCAAATCGCTT     |
| <i>ELA</i>   | AACAACCTCAGGATGGCAAC     | CCTTTGTGAAACCCACCACT      |
| <i>l8s</i>   | AAACGGCTACCACATCCAAG     | CCTCCAATGGATCCTCGTTA      |
| <i>Brg1</i>  | CACCTAACCTCACCAAGAAGATGA | CTTCTTGAAGTCCACAGGCTTTC   |
| <i>FoxM1</i> | TCTCCTTCTGGACCATTACC     | CTCAGGATTGGGTCGTTTCT      |

**Supplementary Table 2; Echocardiography and Heart Weight to Body Weight ratio data of sham or TAC operated wild type mice treated with either ELA or Apelin.**

|                       | sham + Vehicle | TAC + Vehicle              | TAC + ELA                     | TAC + Apelin                  |
|-----------------------|----------------|----------------------------|-------------------------------|-------------------------------|
| N                     | 5              | 6                          | 5                             | 5                             |
| <b>HW / BW (mg/g)</b> | 4.73 ± 0.16    | 7.78 ± 1.12 <sup>###</sup> | 6.27 ± 0.49*                  | 6.28 ± 0.44**                 |
| <b>HR (bpm)</b>       | 654.47 ± 12.66 | 542.23 ± 38.24             | 560.23 ± 21.44                | 618.38 ± 25.45                |
| <b>FS (%)</b>         | 52.38 ± 3.83   | 26.19 ± 5.65 <sup>##</sup> | 43.68 ± 5.80 <sup>##,**</sup> | 42.33 ± 6.81 <sup>##,**</sup> |
| <b>EF (%)</b>         | 84.47 ± 3.30   | 51.33 ± 9.99 <sup>##</sup> | 75.12 ± 6.26                  | 73.35 ± 7.56                  |
| <b>LVESD (mm)</b>     | 1.48 ± 0.17    | 2.88 ± 0.48 <sup>##</sup>  | 1.99 ± 0.32*                  | 2.34 ± 0.42                   |
| <b>LVEDD (mm)</b>     | 3.11 ± 0.15    | 3.89 ± 0.37                | 3.51 ± 0.29                   | 3.78 ± 0.33                   |
| <b>IVS (mm)</b>       | 0.68 ± 0.04    | 0.93 ± 0.03 <sup>#</sup>   | 0.79 ± 0.11*                  | 0.81 ± 0.05**                 |
| <b>PWT (mm)</b>       | 0.71 ± 0.04    | 0.91 ± 0.10 <sup>#</sup>   | 0.79 ± 0.10*                  | 0.82 ± 0.06                   |

Values were means ±SEM. . Abbreviations; N, number of mice per group; HR, heart rate; FS, fractional shortening; EF, ejection fraction; LVESD, left ventricular end systolic diameter; LVEDD, left ventricular end diastolic diameter; IVS, interventricular septum; PWT, posterior wall thickness. #  $P < 0.05$  and ##  $P < 0.01$  compared with sham operated wild type mice. \* $P < 0.05$ , \*\* $P < 0.01$  compared with vehicle treated wild type mice with TAC, one-way ANOVA with Turkey's post hoc test.
